# Supplementary material for: Lacticaseibacillus rhamnosus OF44 Alleviates Allergic Rhinitis by Rebalancing Host Immunity and Gut Microbial Function
Source: Research Square preprint supplement (doi:10.21203/rs.3.rs-8787166/v1), 2026-02-18
Supplement: Supplementary file 1 [file e9cbbc02345bcd71b4177a60.docx]

***Lacticaseibacillus rhamnosus* OF44 Alleviates Allergic Rhinitis by Rebalancing Host Immunity and Gut Microbial Function**

Liehai Hu1, 2, Bin Hou1, 2, Wenjun Tai1, 2, Yunhui Xia1, 2, *, Dongmei Li1, 2, *, Bin Shi1 *

1 State Key Laboratory of Analytical Chemistry for Life Science & Pulmonary and Critical Care Medicine, Suqian People's Hospital of Nanjing Gulou Hospital Group, Suqian Scientific Research Institute of Nanjing University Medical School, Nanjing University, Suqian, 223800 Jiangsu, China.

2 Jiangsu Key Laboratory of Molecular Medicine, Nanjing University, Nanjing, Jiangsu 210093, China

*Corresponding Author at: State Key Laboratory of Analytical Chemistry for Life Science & Pulmonary and Critical Care Medicine, Suqian People's Hospital of Nanjing Gulou Hospital Group, Suqian Scientific Research Institute of Nanjing University Medical School, Nanjing University, Suqian, 223800 Jiangsu, China

E-mail address: yunhuixia@nju.edu.cn (Yunhui Xia)

1. mail address: lidm@nju.edu.cn (Dongmei Li)

E-mail address: shibin01230123@126.com (Bin Shi)


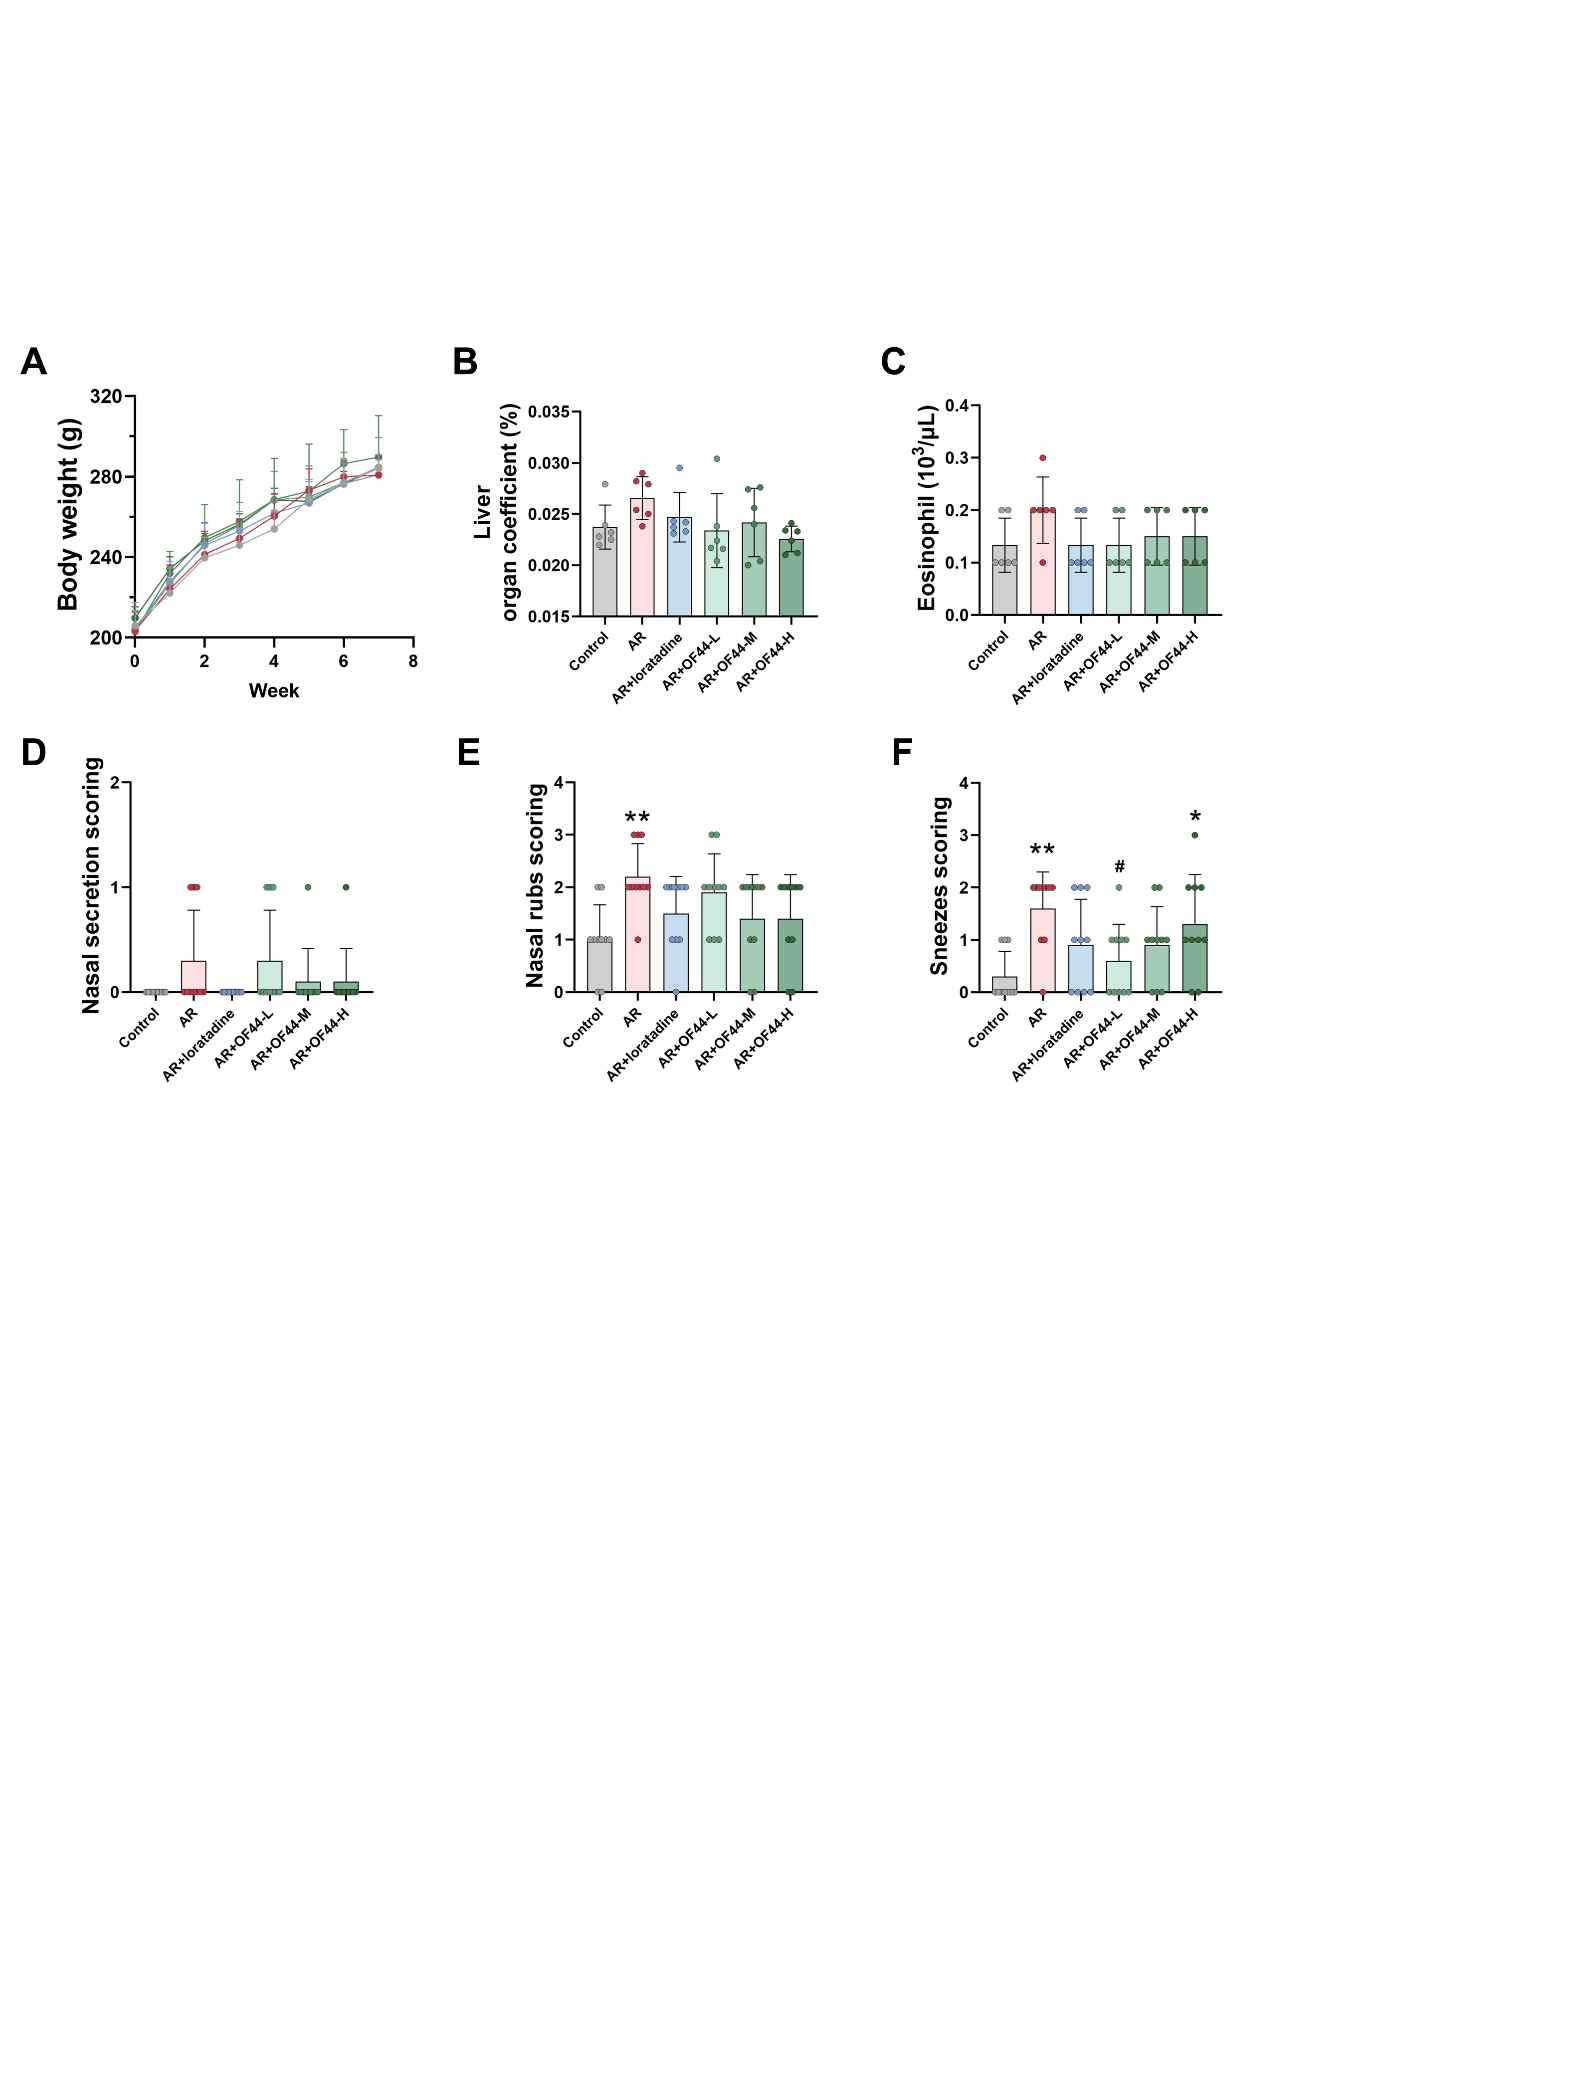


**Figure S1.** **(A)** Changes in body weight of rats during experiment. **(B)** Liver organ coefficient. **(C)** Blood eosinophil counts. **(D–F)** Scores for nasal secretion, nasal rubs, and sneezing in the rhinitis symptom assessment.


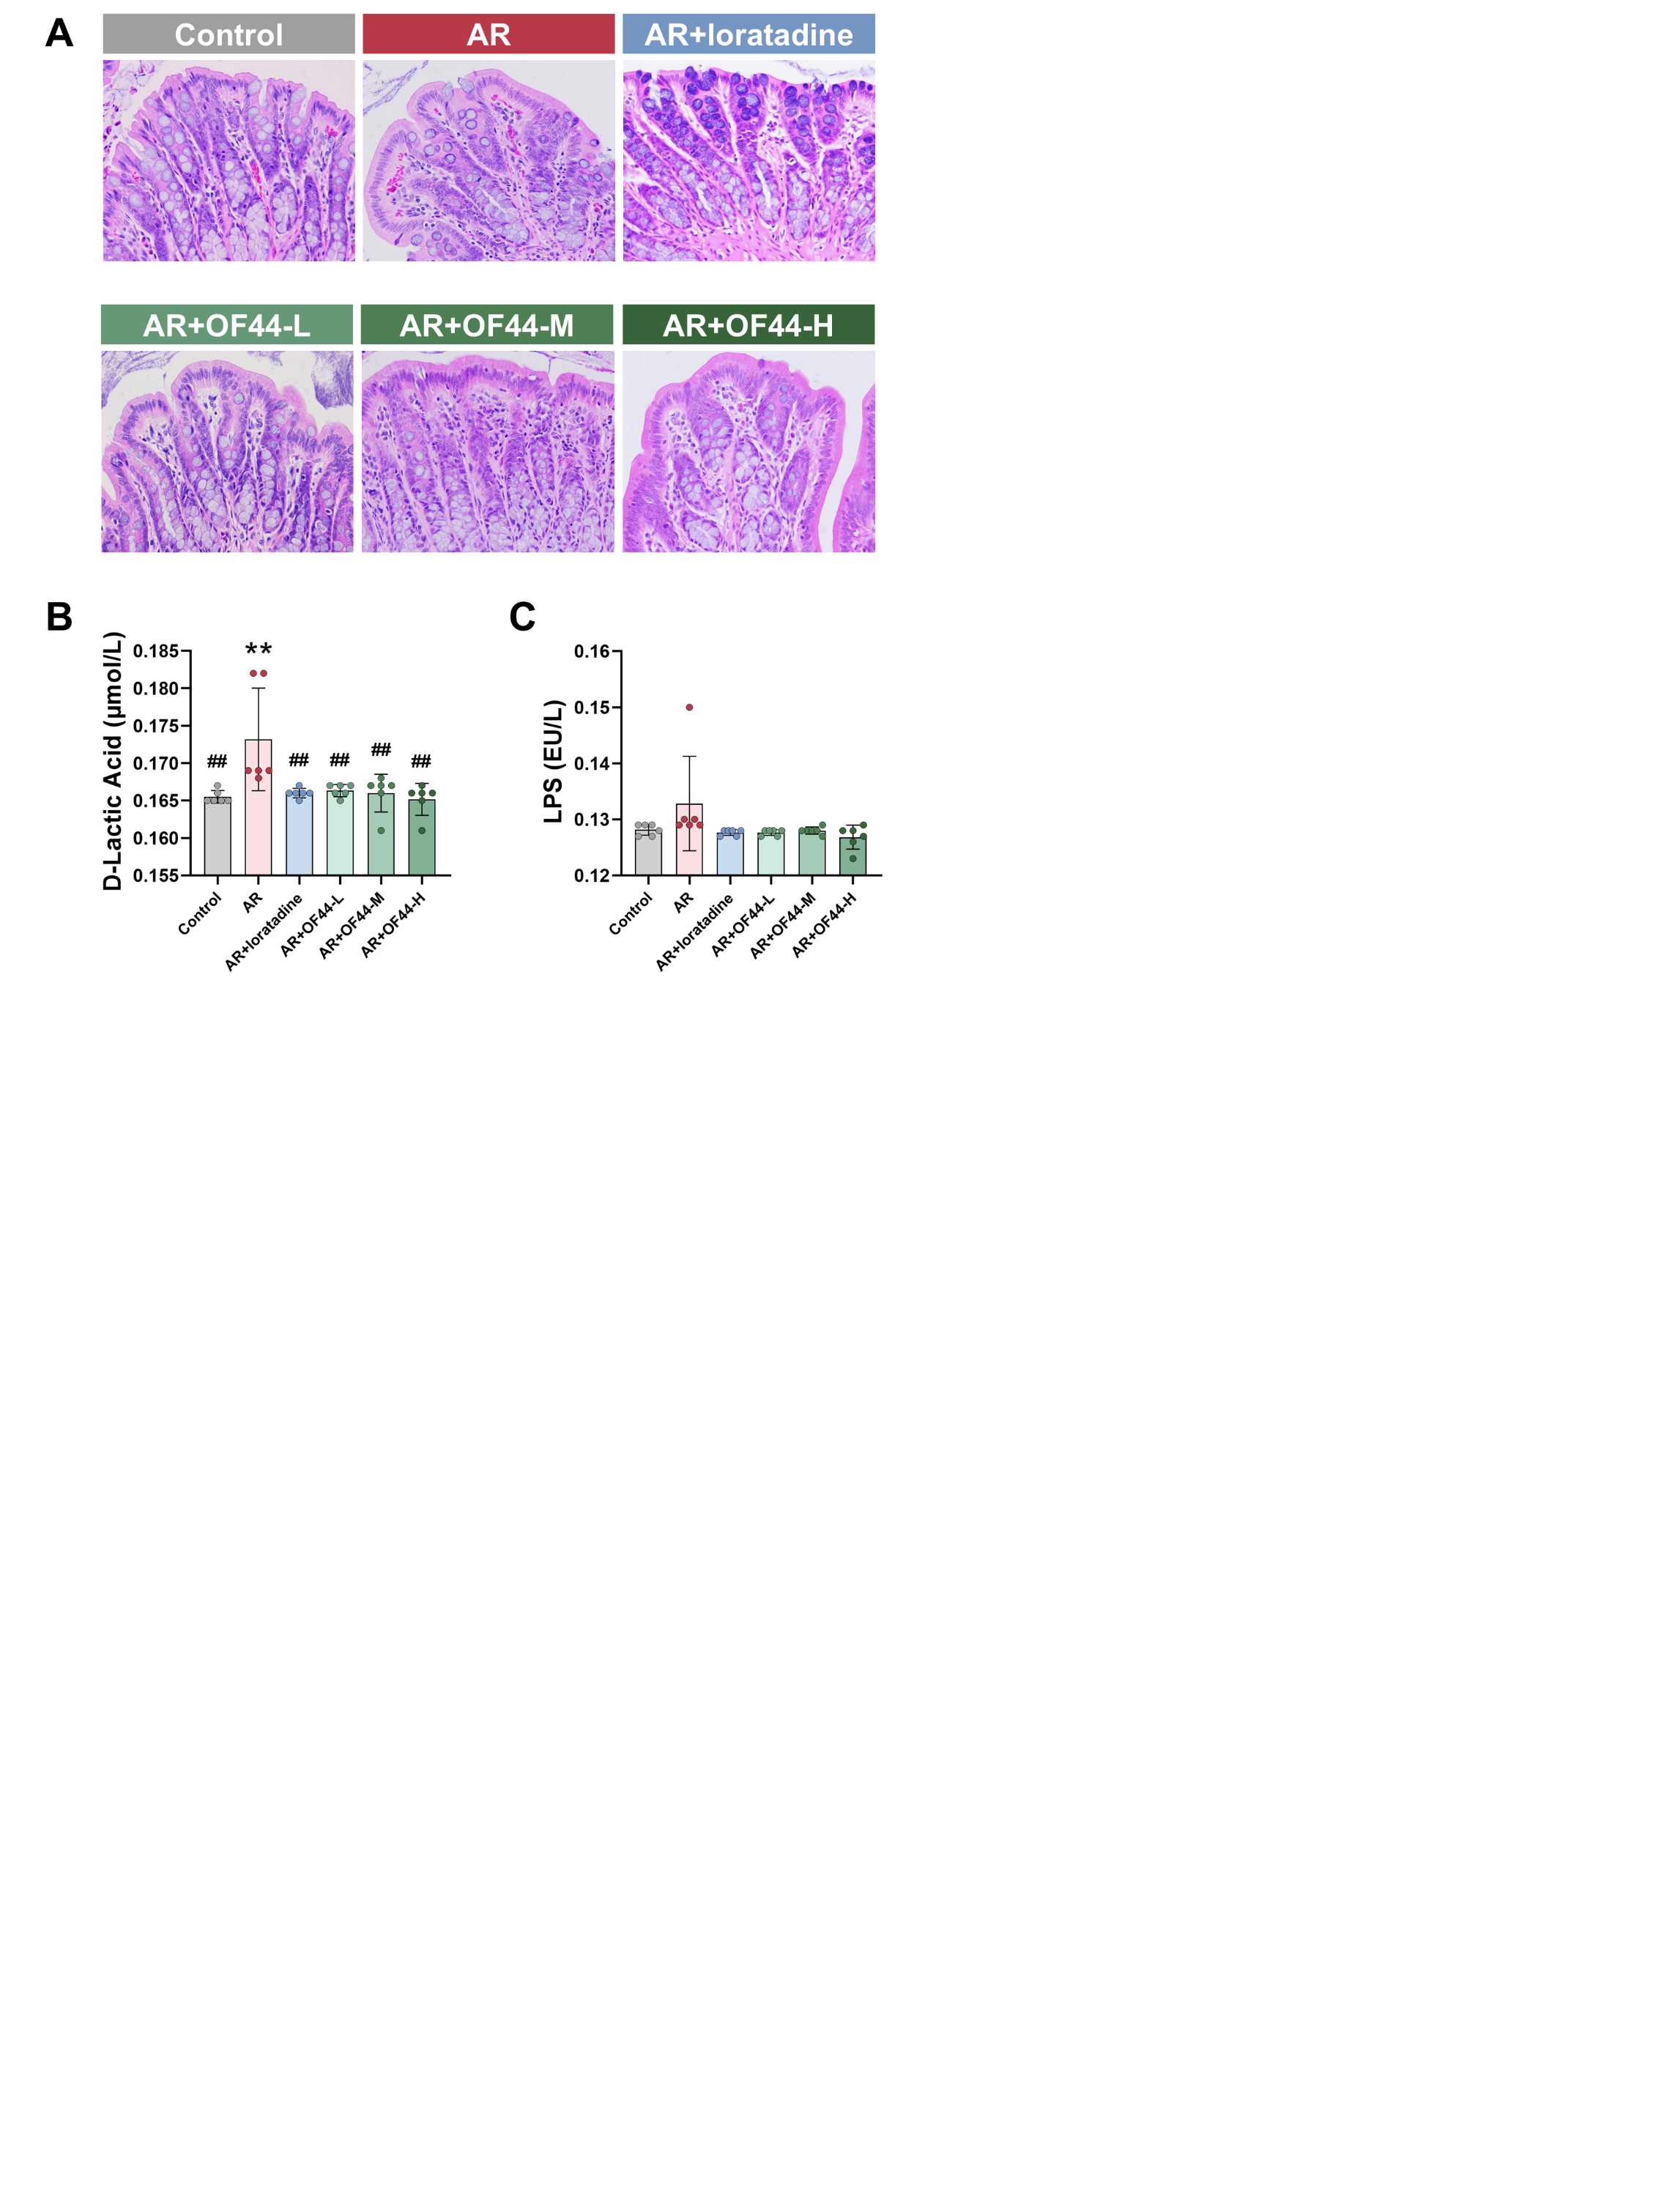


**Figure S2.** **(A)** Hematoxylin and eosin-stained sections of rat colon. **(B)** Serum D-lactic acid concentration. **(C)** Serum LPS concentration.


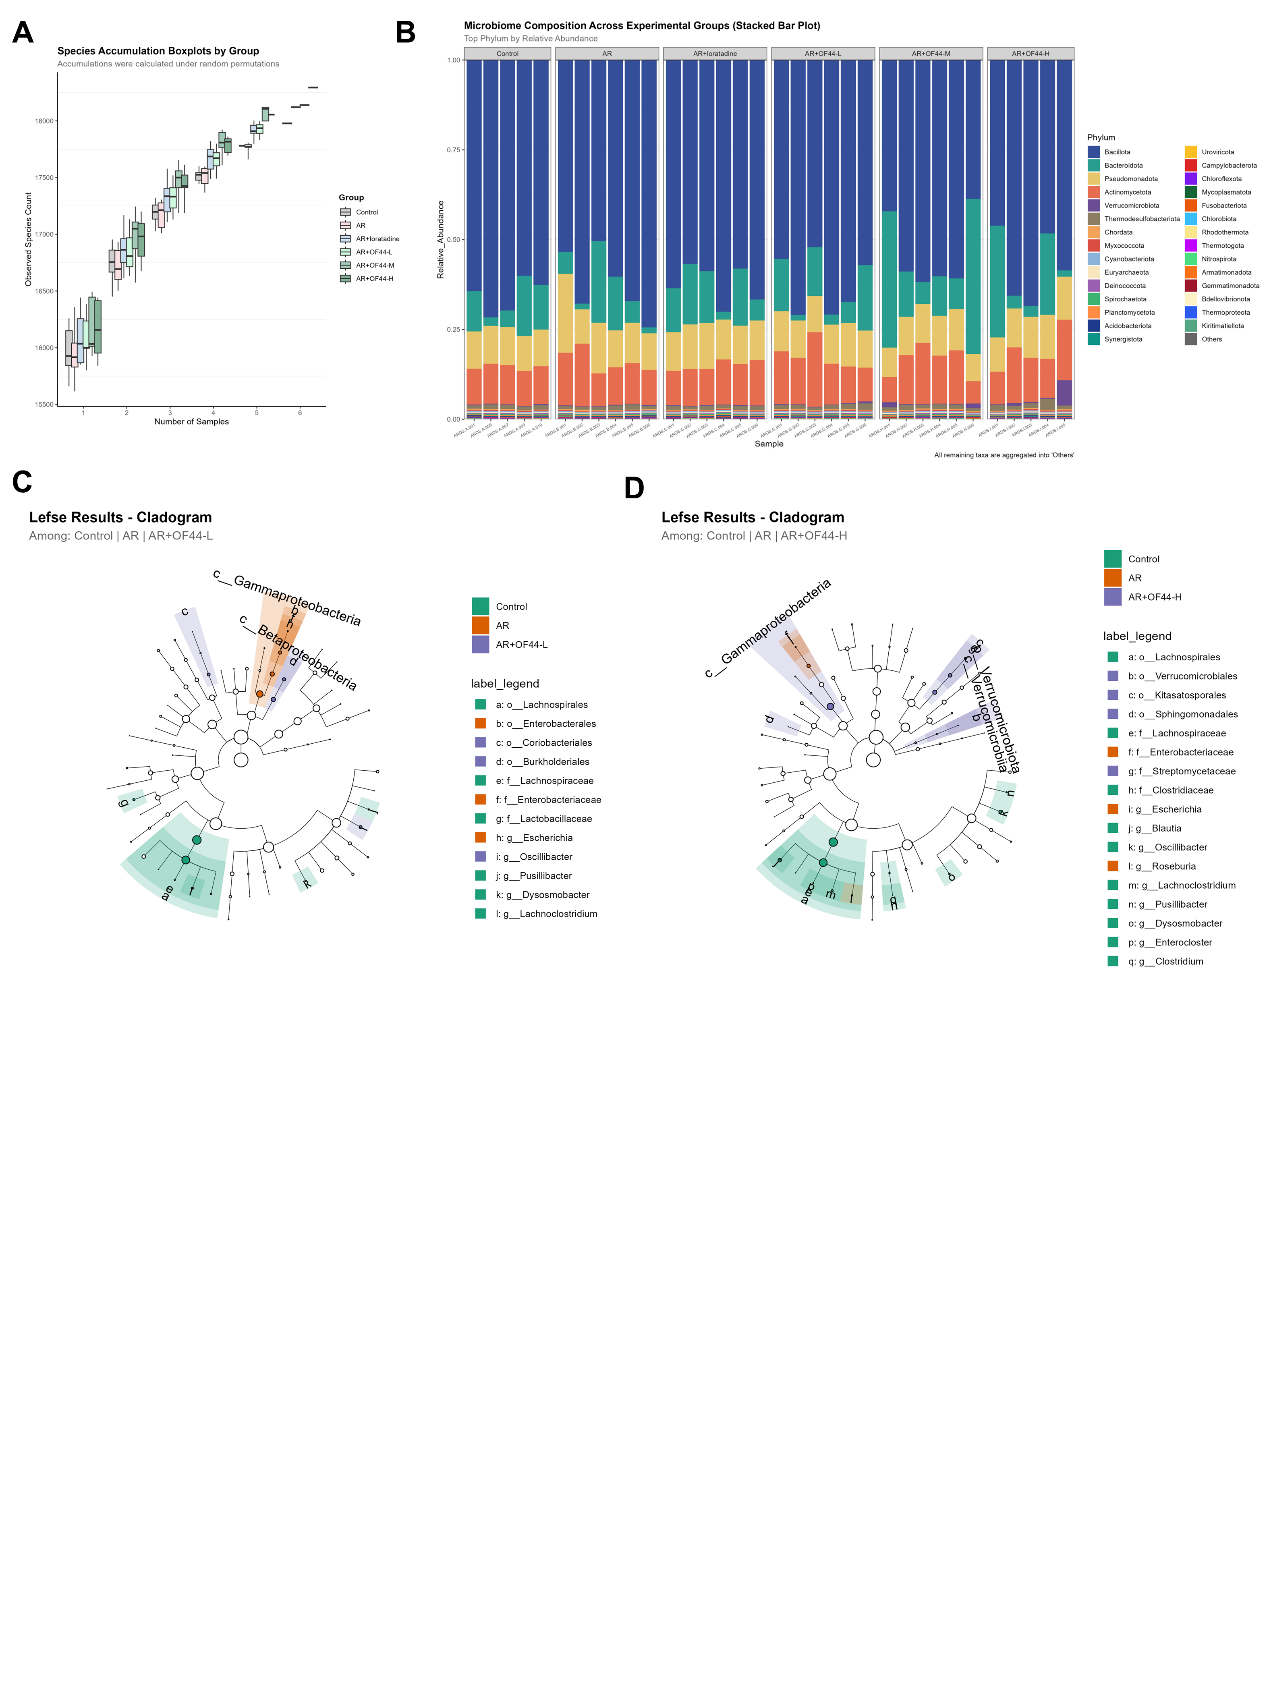


**Figure S3.** **(A)** Species accumulation boxplot. **(B)** Alluvial diagram at the phylum level. **(C–D)** LEfSe evolutionary cladograms of differential species.


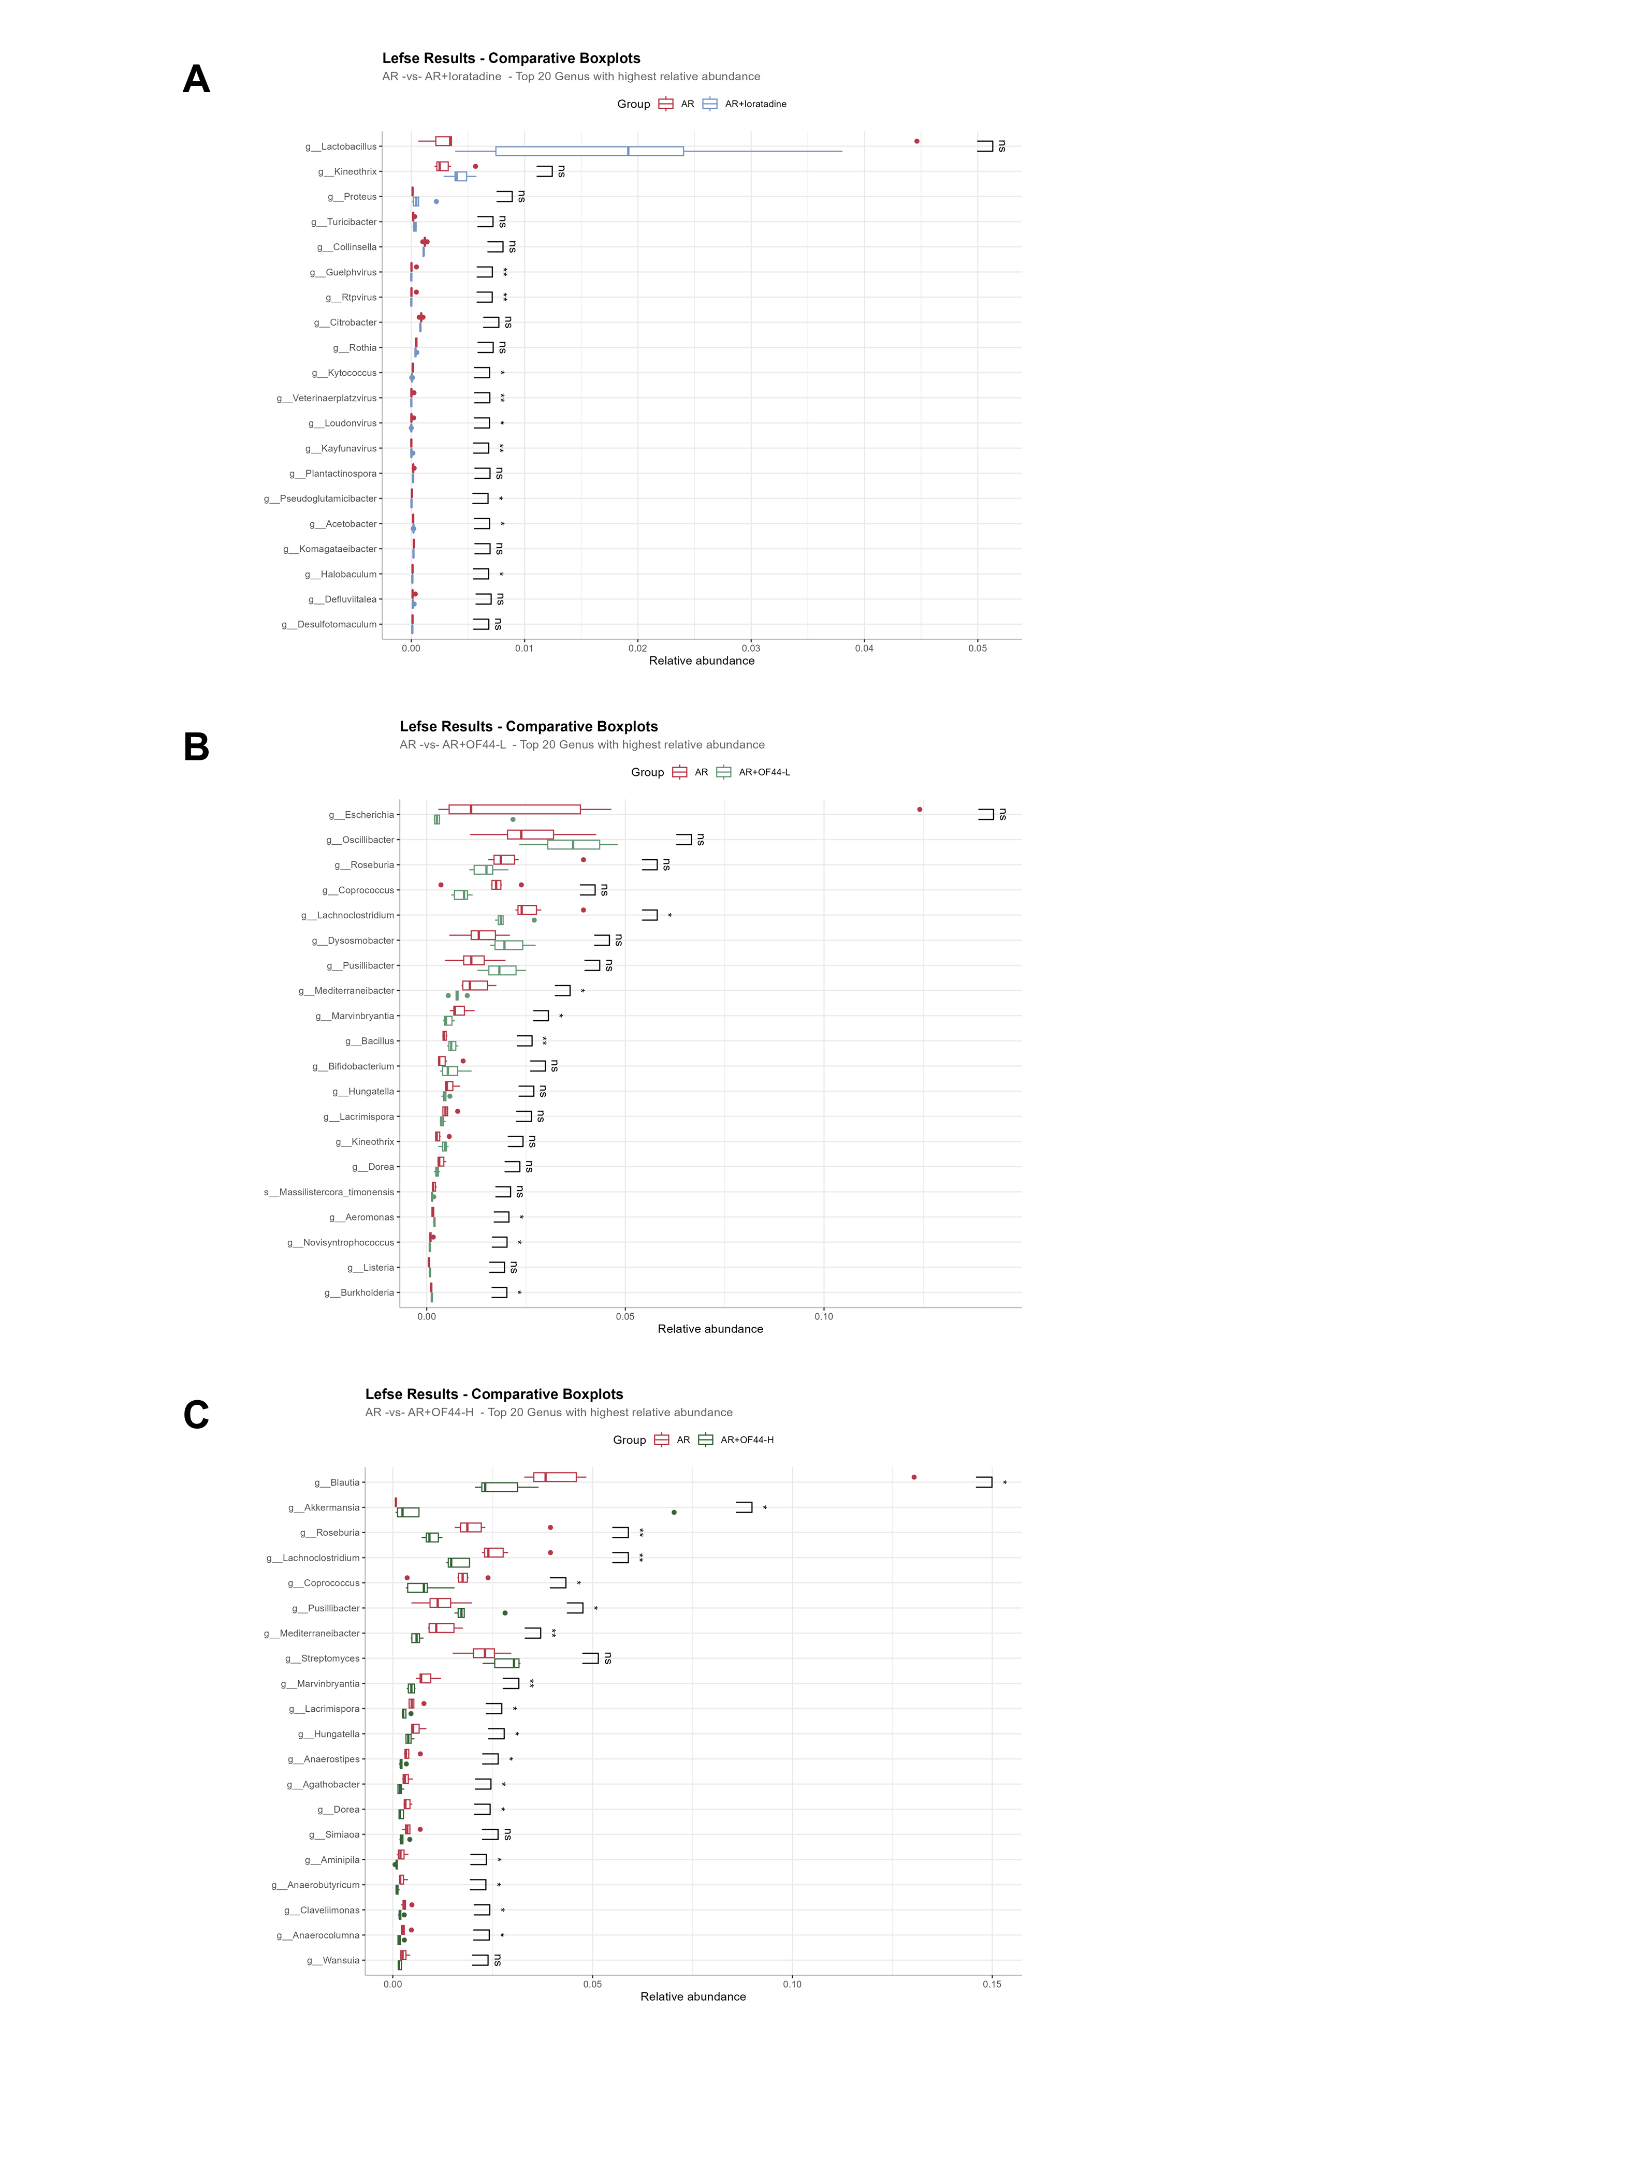


**Figure S4.** **(A–C)** LEfSe box plots showing the top 20 genus with the highest relative abundance and statistical significance.


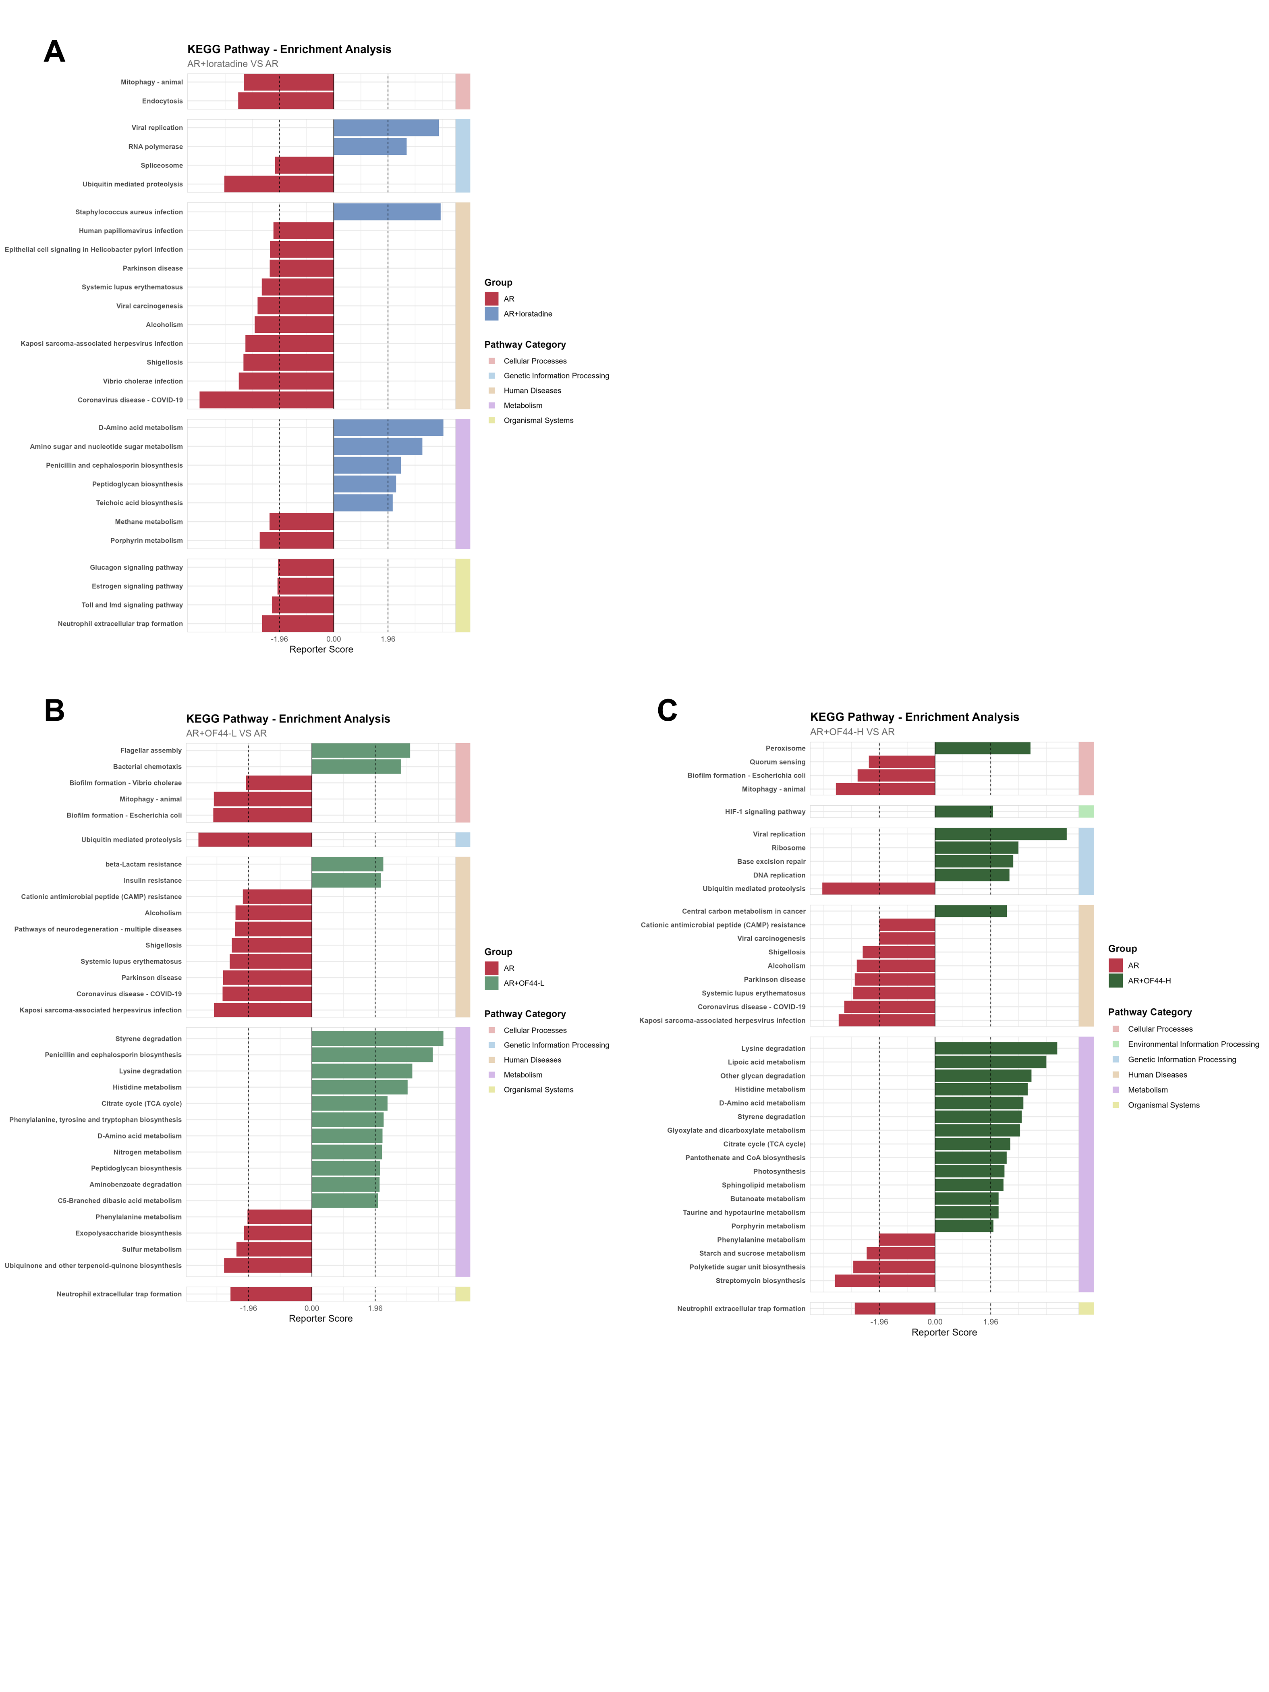


**Figure S5.** **(A–C)** ReporterScore results based on KEGG pathway.


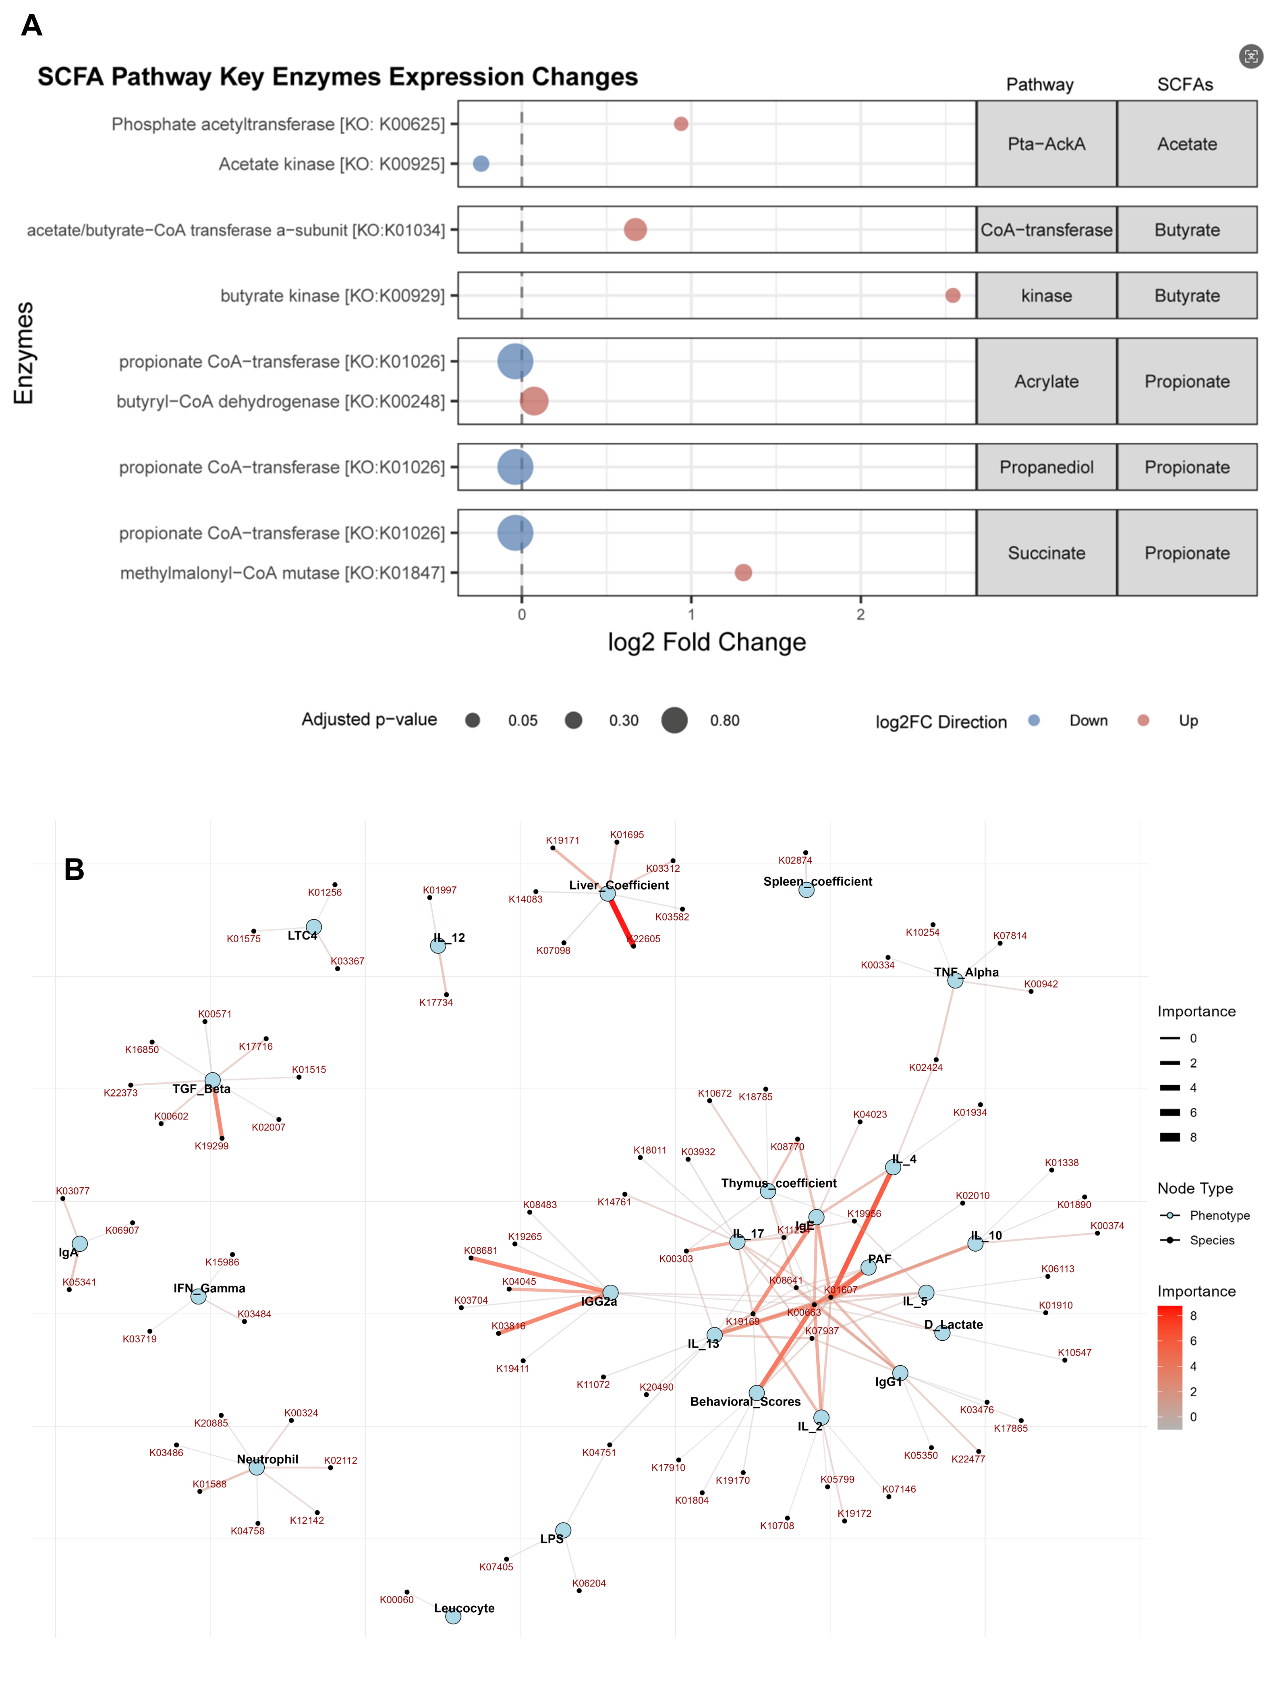


**Figure S6.** **(A)** SCFA-related pathway key enzymes expression changes, AR+OF44-M group v.s. control group. **(B)** Species–KO association network visualized using the Fruchterman–Reingold force-directed layout algorithm.


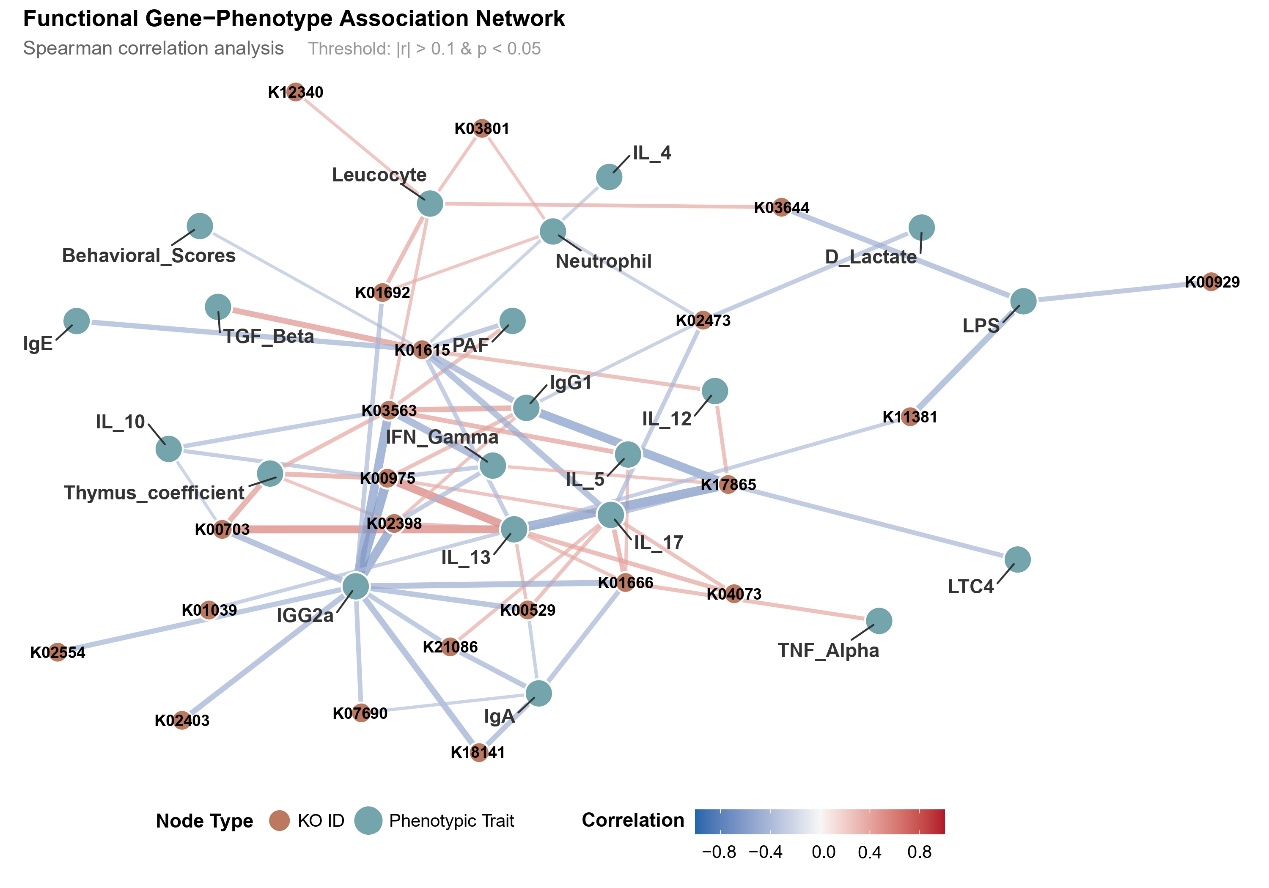


**Figure S6.** Functional gene-phenotype association network.


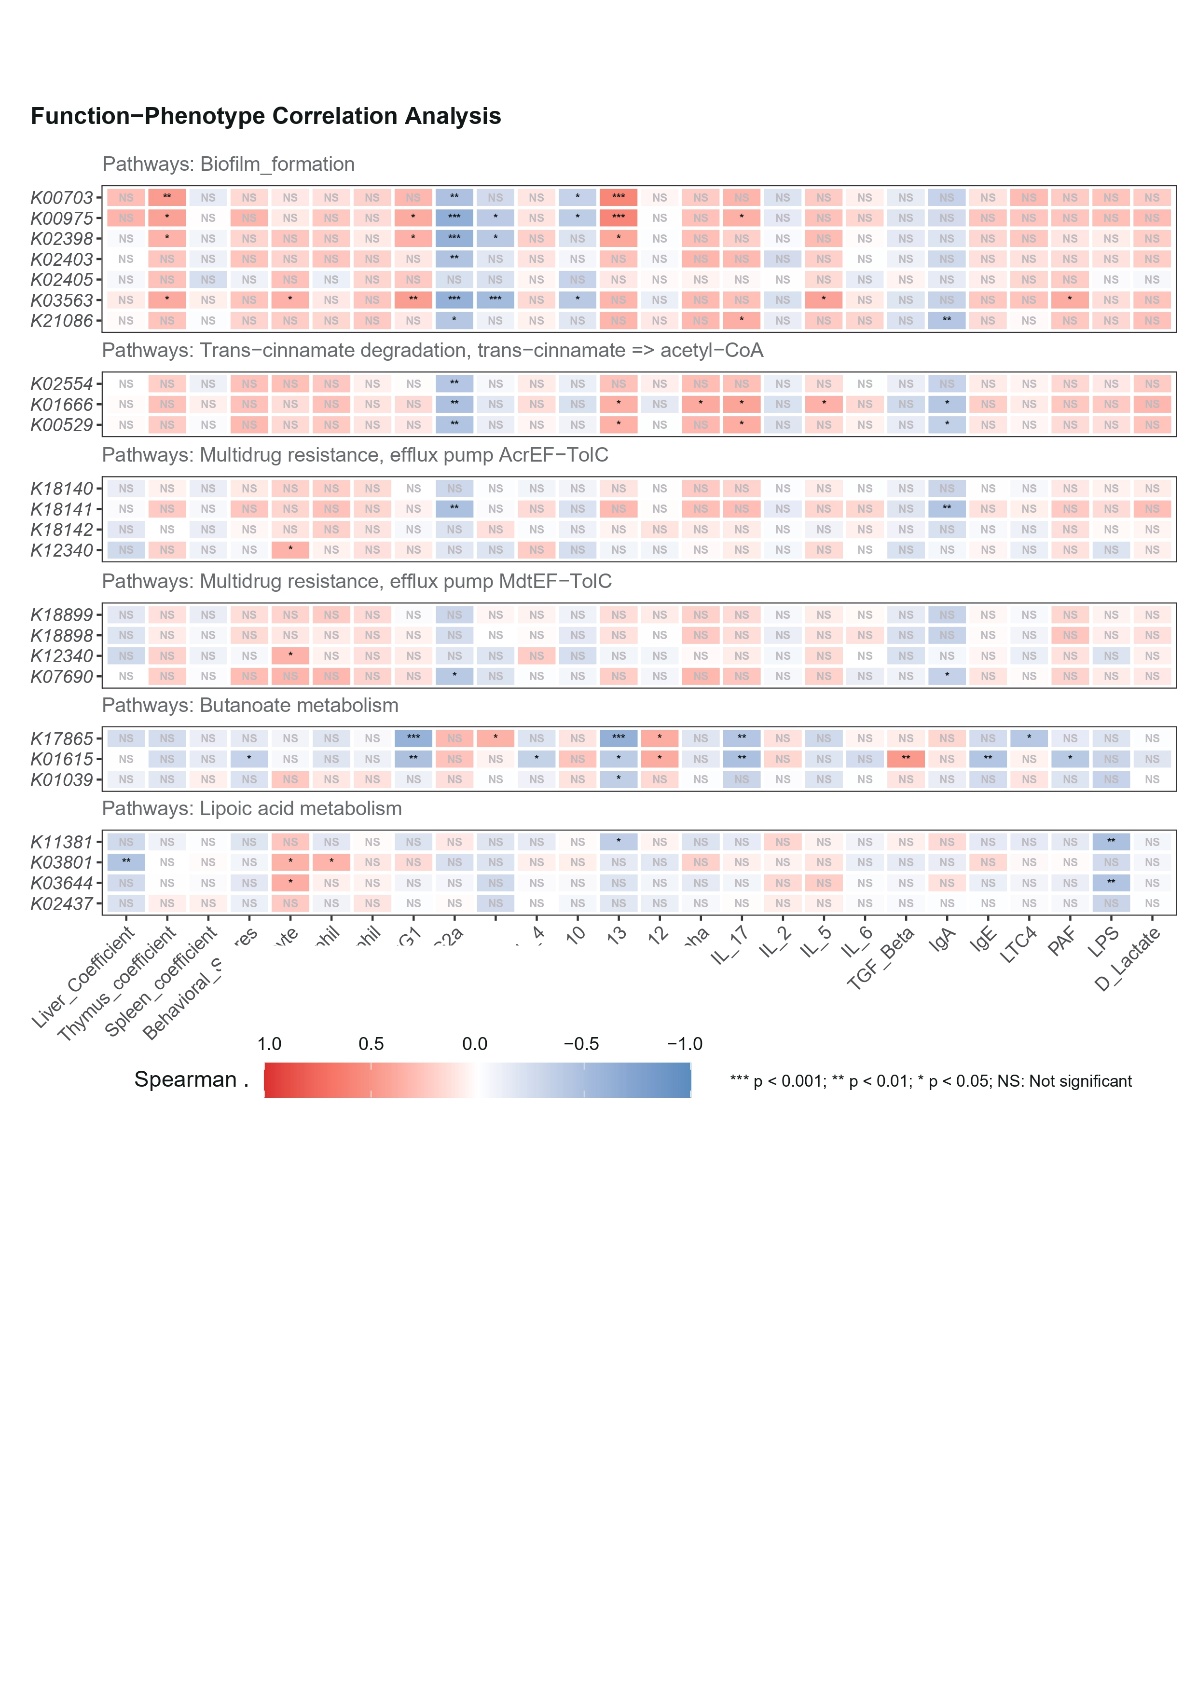


**Figure S6.** **(A)** Function-phenotype correlation analysis.
